# Supplementary material for: Analysis of association of gene variants with obesity traits in New Zealand European children at 6 years of age
Source: Royal Society of Chemistry journal article supplement (doi:10.1039/c7mb00104e), 2017-05-23
Supplement: c7mb00104e1.pdf [file c7mb00104e1.pdf]

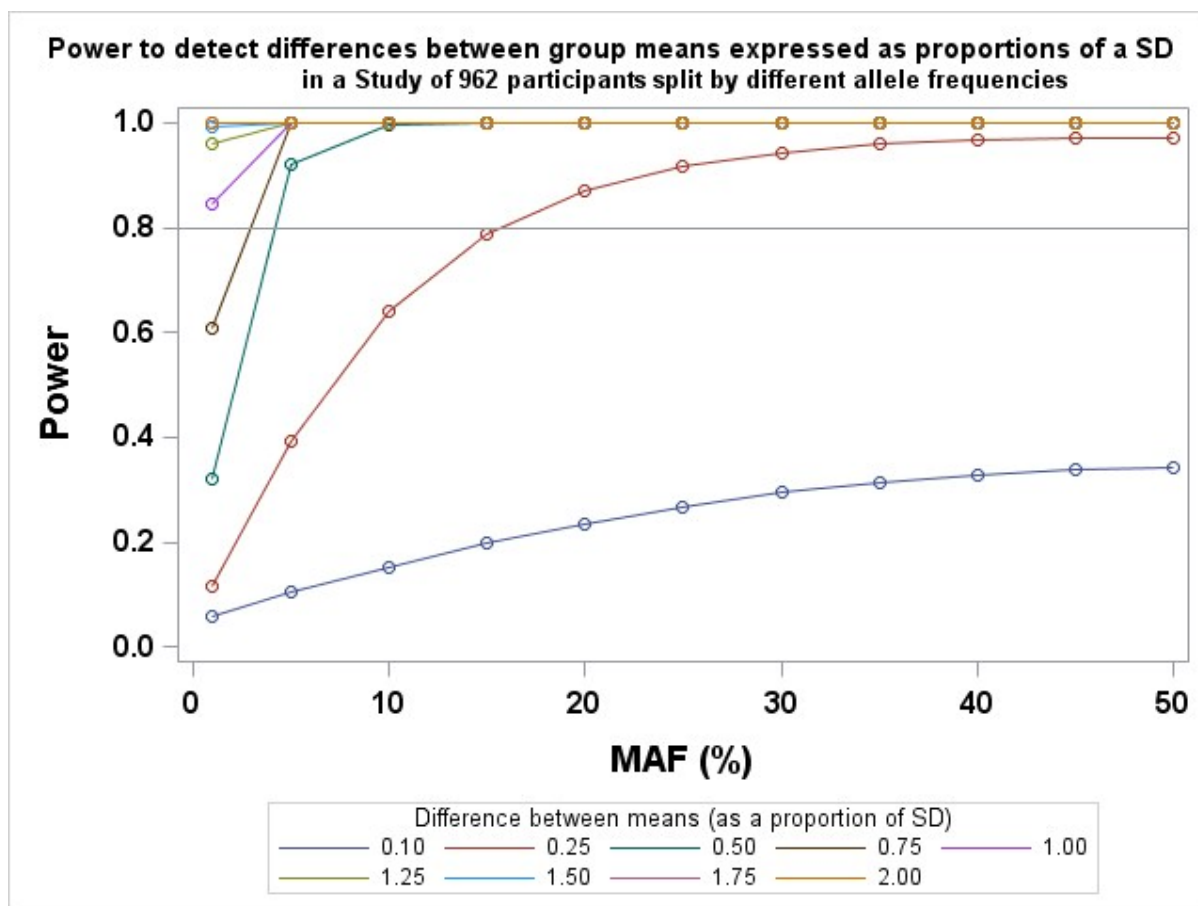

**Supplementary Figure 1: Equivalence of two means power analysis to detect differences between group means expressed as proportions of a standard deviation in a study of 962 European children stratified by different allele frequencies.**
