# Supplementary material for: Analysis of association of gene variants with obesity traits in New Zealand European children at 6 years of age
Source: Royal Society of Chemistry journal article supplement (doi:10.1039/c7mb00104e), 2017-05-23
Supplement: c7mb00104e5.pdf [file c7mb00104e5.pdf]

**Supplementary Table 4: Haplotype analysis of the *NYP* rs16139/rs17149106 variant combination with PBF scores of European children in Children of SCOPE.** The A/T and G/G haplotypes are not shown due to the low frequency of these combinations.

| CHR | Gene | rs16139/ rs17149106 | Hap Frequency | Hap Score | <i>p</i> -value | Global <i>p</i> -value |
|-----|------|---------------------|---------------|-----------|-----------------|------------------------|
| 7   | NPY  | A/G                 | 0.965         | -2.76     | 0.0058          | 0.022                  |
|     |      | G/T                 | 0.0333        | 2.71      | 0.0068          |                        |
